# Supplementary material for: Regioselective synthesis of 3,4-disubstituted isocoumarins through the Pd-catalyzed annulation of 2-iodoaromatic acids with ynamides
Source: Royal Society of Chemistry journal article supplement (doi:10.1039/c6cc01565d), 2016-01-01
Supplement: c6cc01565d1.pdf [file c6cc01565d1.pdf]

SUPPORTING INFORMATION

for the  
communication  
entitled

**Regioselective Synthesis of 3,4-Disubstituted Isocoumarins by Pd-Catalyzed Annulation of 2-Iodoaromatic Acids with Ynamides**

authored by

Hongxu Liu, Yanyan Yang, Jie Wu, Xiao-Na Wang,<sup>\*,a</sup> and Junbiao Chang<sup>\*,a, b</sup>

<sup>a</sup> Collaborative Innovation Center of New Drug Research and Safety Evaluation, Henan Province, School of Pharmaceutical Sciences, and <sup>b</sup> College of Chemistry and Molecular Engineering, Zhengzhou University, Zhengzhou, Henan 450001, P. R. China

## GENERAL EXPERIMENTAL INFORMATION

All reactions were performed in oven-dried glassware under nitrogen atmosphere. Solvents were distilled prior to use. Chromatographic separations were performed using 200–300 mesh silica gel.  $^1\text{H}$  NMR and  $^{13}\text{C}$  NMR spectra were obtained on a Bruker's Ascend<sup>TM</sup> 400 NMR spectrometer using  $\text{CDCl}_3$  as solvent with TMS or residual solvent as standard unless otherwise noted.  $^{13}\text{C}$  NMR (100 MHz) spectra were reported in ppm with the internal chloroform signal at 77.2 ppm as a standard. Infrared spectra were obtained on a Bruker ALPHA FT/IR spectrophotometer and relative intensities are expressed qualitatively as s (strong), m (medium), and w (weak). TLC analysis was performed using 254 nm polyester-backed plates and visualized using UV and  $\text{KMnO}_4$  stain. High-resolution mass spectra (HRMS) was performed on a Bruker MicrOTOF-Q II mass spectrometer. All spectral data obtained for new compounds are reported here.

### Procedure for Synthesis of Ynamides **2c**.

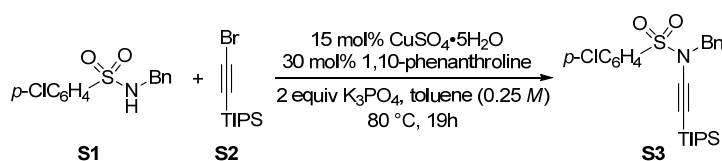

To a oven-dried screw-cap vial were added (in the following order) amide **S1** (752.5 mg, 2.67 mmol),  $\text{CuSO}_4 \cdot 5\text{H}_2\text{O}$  (100.0 mg, 0.40 mmol), 1,10-phenanthroline (144.3 mg, 0.80 mmol) and  $\text{K}_3\text{PO}_4$  (1.13 g, 5.34 mmol), toluene (10.7 mL, amide *concn* = 0.25 M), and the alkyne bromide **S2** (837.3 mg, 3.20 mmol). The vial was evacuated under vacuum and flushed with nitrogen gas for three times, then sealed under nitrogen and heated to 80 °C. When the reaction was judged to be complete by TLC after 19 hours, the mixture was cooled to rt, filtered through a pad of silica gel, and purified by silica gel flash column chromatography [isocratic eluent: 20:1 petroleum ether/EtOAc + 3%  $\text{NEt}_3$ ] to afford ynamide **S3** (1.13 g, 2.45 mmol, 92% yield).

**S3**:  $R_f$  = 0.47 [20:1 petroleum ether/EtOAc]; white solid; mp = 49–50 °C;  $^1\text{H}$  NMR (400 MHz,  $\text{CDCl}_3$ )  $\delta$  0.96 (s, 21H), 4.53 (s, 2H), 7.27–7.31 (m, 5H), 7.41–7.45 (m, 2H), 7.73–7.77 (m, 2H);  $^{13}\text{C}$  NMR (100 MHz,  $\text{CDCl}_3$ )  $\delta$  11.4, 18.7, 55.9, 70.9, 96.1, 128.6, 128.7, 129.1, 129.3, 129.4, 134.2, 136.2, 140.3; IR (KBr) ( $\text{cm}^{-1}$ ) 2943s, 2865s, 2163s, 1586w, 1477m, 1458m, 1373s, 1170s, 1094s, 1011s; HRMS (ESI):  $m/z$  calcd for  $\text{C}_{24}\text{H}_{32}\text{ClNO}_2\text{SSiNa}$  [ $\text{M}+\text{Na}$ ]<sup>+</sup>: 484.1504; found 484.1504.

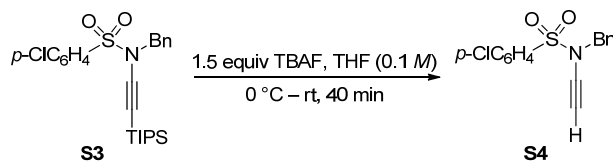

To an oven-dried flask were added ynamide **S3** (1.13 g, 2.45 mmol) and THF (24.5 mL, ynamide *concn* = 0.10 M). The solution was cooled to 0 °C, and TBAF (3.67 mL, 3.67 mmol, 1.0 M in THF) was added dropwise via syringe. After the addition was complete, the mixture was allowed to warm to rt. The reaction was judged to be complete by TLC analysis after 40 min, and saturated NH<sub>4</sub>Cl solution (20 mL) was added to quench the reaction. The quenched mixture was extracted with EtOAc, dried over anhydrous Na<sub>2</sub>SO<sub>4</sub>, filtered, concentrated *in vacuo* and purified by silica gel flash column chromatography [isocratic eluent: 20:1 petroleum ether/EtOAc + 3% NEt<sub>3</sub>] to afford crude product. After washed with 10:1 petroleum ether/EtOAc, pure ynamide **S4** (618.0 mg, 2.02 mmol, 82% yield) was obtained.

**S4**:  $R_f$  = 0.27 [20:1 petroleum ether/EtOAc]; white solid; mp = 96–97 °C; <sup>1</sup>H NMR (400 MHz, CDCl<sub>3</sub>) δ 2.71 (s, 1H), 4.53 (s, 2H), 7.27–7.31 (m, 5H), 7.44–7.47 (m, 2H), 7.73–7.77 (m, 2H); <sup>13</sup>C NMR (100 MHz, CDCl<sub>3</sub>) δ 55.7, 60.1, 76.1, 128.7, 128.78, 128.84, 129.2, 129.6, 134.1, 136.2, 140.5; IR (KBr) (cm<sup>-1</sup>) 3280s, 2138m, 1584m, 1475m, 1452m, 1367s, 1283m, 1169s, 1095s, 1085s, 1012s; HRMS (ESI): *m/z* calcd for C<sub>15</sub>H<sub>12</sub>ClNO<sub>2</sub>SNa [M+Na]<sup>+</sup>: 328.0169; found 328.0165.

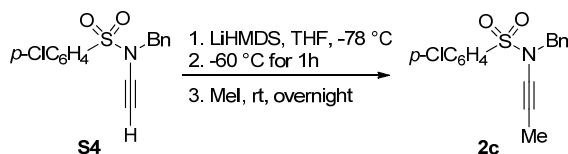

To an oven-dried flask were charged with ynamide **S4** (244.6 mg, 0.80 mmol) and THF (5 mL, ynamide *concn* = 0.16 M). To this solution at -78 °C was added LHMDS (1.20 mL, 1.0 M in THF), and then the mixture was allowed to warm to -60 °C. After the reaction was stirred at -60 °C for 1 h, MeI (0.10 mL, 1.60 mmol) was added, the resulting mixture was warmed to rt slowly, stirred overnight (12 h) and monitored using TLC analysis, water (10 mL) was added to quench the reaction. The quench mixture was extracted with EtOAc, dried over anhydrous Na<sub>2</sub>SO<sub>4</sub>, filtered, concentrated *in vacuo* and purified by silica gel flash column chromatography [isocratic eluent: 20:1 petroleum ether/EtOAc + 3% NEt<sub>3</sub>] to afford ynamide **2c** (250.7 mg, 0.78 mmol) in 98% yield.

**2c**:  $R_f$  = 0.26 [20:1 petroleum ether/EtOAc]; yellow solid; mp = 76–77 °C; <sup>1</sup>H NMR (400 MHz, CDCl<sub>3</sub>) δ 1.83 (s, 3H), 4.48 (s, 2H), 7.27–7.31 (m, 5H), 7.44–7.48 (m, 2H), 7.73–7.76 (m, 2H); <sup>13</sup>C NMR (100

MHz, CDCl<sub>3</sub>)  $\delta$  3.4, 55.9, 66.7, 72.1, 128.4, 128.6, 128.7, 129.1, 129.4, 134.7, 136.4, 140.1; IR (KBr) (cm<sup>-1</sup>) 3088m, 2917w, 2265w, 1583m, 1476m, 1455m, 1375s, 1184s, 1172s, 1091s, 1084s; HRMS (ESI): *m/z* calcd for C<sub>16</sub>H<sub>14</sub>ClNO<sub>2</sub>SNa [M+Na]<sup>+</sup>: 342.0326; found 342.0311.

### Procedure for Synthesis of Ynamides **2e**.

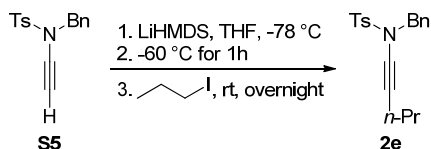

To a oven-dried flask was added ynamide **S5**<sup>1</sup> (285.4 mg, 1.00 mmol) and THF (7 mL, ynamide *concn* = 0.14 M). To this solution at -78 °C was added LHMDS (1.50 mL, 1.0 M in THF), and then the mixture was allowed to warm to -60 °C. After the reaction was stirred at -60 °C for 1 h, *n*-propyl iodide (0.19 mL, 2.00 mmol) was added, the resulting mixture was warmed to rt slowly, stirred overnight (12 h) and monitored using TLC analysis, water (10 mL) was added to quench the reaction. The quench mixture was extracted with EtOAc, dried over anhydrous Na<sub>2</sub>SO<sub>4</sub>, filtrated, concentrated *in vacuo* and purified by silica gel flash column chromatography [isocratic eluent: 20:1 petroleum ether/EtOAc + 3% NEt<sub>3</sub>] to afford ynamide **2e** (223.3 mg, 0.68 mmol) in 68% yield.

**2e**: *R<sub>f</sub>* = 0.23 [20:1 petroleum ether/EtOAc]; colorless oil; <sup>1</sup>H NMR (400 MHz, CDCl<sub>3</sub>)  $\delta$  0.82 (t, 3H, *J* = 7.4 Hz), 1.35-1.44 (m, 2H), 2.13 (t, 2H, *J* = 6.9 Hz), 2.43 (s, 3H), 4.44 (s, 2H), 7.27-7.31 (m, 7H), 7.74 (d, 2H, *J* = 8.0 Hz); <sup>13</sup>C NMR (100 MHz, CDCl<sub>3</sub>)  $\delta$  13.4, 20.5, 21.7, 22.4, 55.7, 70.9, 73.6, 127.8, 128.2, 128.5, 128.8, 129.7, 134.9, 135.0, 144.4; IR (film) (cm<sup>-1</sup>) 2963m, 2932m, 2872w, 2253w, 2044w, 1597m, 1496m, 1456m, 1363s, 1168s; HRMS (ESI): *m/z* calcd for C<sub>19</sub>H<sub>21</sub>NO<sub>2</sub>SNa [M+Na]<sup>+</sup>: 350.1185; found 350.1193.

### General Procedure for the Synthesis of 3,4-Disubstituted Isocoumarins **3**.

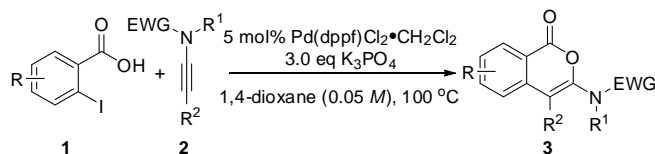

To an oven-dried sealed tube were added 2-iodobenzoic acid **1a** (99.2 mg, 0.40 mmol), ynamide **2a**<sup>1</sup> (59.9 mg, 0.20 mmol), Pd(dppf)Cl<sub>2</sub>·CH<sub>2</sub>Cl<sub>2</sub> (8.2 mg, 0.01 mmol), K<sub>3</sub>PO<sub>4</sub> (127.4 mg, 0.60 mmol) and 1,4-dioxane (4.0 mL, ynamide *concn* = 0.05 M) in sequence at rt. The reaction vessel was then capped and directly heated to 100 °C. After stirring at 100 °C for 16.0 h, the reaction mixture was cooled to rt, filtered through a short plug of silica gel, concentrated *in vacuo*, and purified using silica gel flash

column chromatography [gradient eluent: 20:1~10:1 petroleum ether/EtOAc] to afford isocoumarin **3aa** (82.1 mg, 0.196 mmol) in 98% yield.

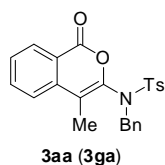

**3ga:** Isocoumarin **3ha** (39.2 mg, 0.093 mmol) was prepared from 2-bromobenzoic acid **1g** (80.4 mg, 0.40 mmol) and ynamide **2a** (59.9 mg, 0.20 mmol) in 47% yields after stirring at 100 °C for 34.0 h.

**3aa (3ga):**  $R_f = 0.17$  [10:1 petroleum ether/EtOAc]; white solid; mp = 144–145 °C;  $^1\text{H NMR}$  (400 MHz,  $\text{CDCl}_3$ )  $\delta$  2.05 (s, 3H), 2.46 (s, 3H), 4.23 (s, 1H), 4.86 (s, 1H), 7.20-7.24 (m, 3H), 7.28-7.30 (m, 2H), 7.37 (d, 2H,  $J = 8.1$  Hz), 7.47-7.52 (m, 2H), 7.71 (t, 1H,  $J = 7.7$  Hz), 7.77 (d, 2H,  $J = 8.2$  Hz), 8.24 (d, 1H,  $J = 7.8$  Hz);  $^{13}\text{C NMR}$  (100 MHz,  $\text{CDCl}_3$ )  $\delta$  12.7, 21.8, 52.4, 115.1, 121.0, 124.4, 128.1, 128.4, 128.6, 128.7, 129.4, 129.9, 130.1, 134.3, 135.0, 135.5, 138.1, 140.9, 144.7, 161.8; IR (KBr) ( $\text{cm}^{-1}$ ) 2920w, 1741s, 1656s, 1597m, 1485m, 1455m, 1353s, 1345s, 1242m, 1166s; HRMS (ESI):  $m/z$  calcd for  $\text{C}_{24}\text{H}_{21}\text{NO}_4\text{SNa}$   $[\text{M}+\text{Na}]^+$ : 442.1083; found 442.1073.

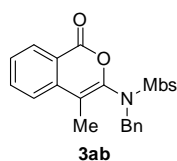

Isocoumarin **3ab** (42.0 mg, 0.096 mmol) was prepared from 2-iodobenzoic acid **1a** (49.6 mg, 0.20 mmol) and ynamide **2b**<sup>2</sup> (31.5 mg, 0.10 mmol) in 96% yields after stirring at 100 °C for 22.0 h.

**3ab:**  $R_f = 0.31$  [4:1 petroleum ether/EtOAc]; white solid; mp = 153–154 °C;  $^1\text{H NMR}$  (400 MHz,  $\text{CDCl}_3$ )  $\delta$  2.05 (s, 3H), 3.90 (s, 3H), 4.23 (s, 1H), 4.85 (s, 1H), 7.04 (d, 2H,  $J = 8.9$  Hz), 7.21-7.25 (m, 3H), 7.28-7.31 (m, 2H), 7.48-7.54 (m, 2H), 7.72 (t, 1H,  $J = 7.6$  Hz), 7.80-7.84 (m, 2H), 8.25 (d, 1H,  $J = 7.8$  Hz);  $^{13}\text{C NMR}$  (100 MHz,  $\text{CDCl}_3$ )  $\delta$  12.7, 52.4, 55.8, 114.6, 115.1, 121.0, 124.4, 128.4, 128.6, 128.8, 129.5, 129.9, 130.0, 130.4, 134.3, 135.1, 138.1, 141.0, 161.9, 163.7; IR (KBr) ( $\text{cm}^{-1}$ ) 2926w, 1723s, 1651s, 1596s, 1497s, 1455m, 1352s, 1265s, 1165s; HRMS (ESI):  $m/z$  calcd for  $\text{C}_{24}\text{H}_{21}\text{NO}_5\text{SNa}$   $[\text{M}+\text{Na}]^+$ : 458.1033; found 458.1023.

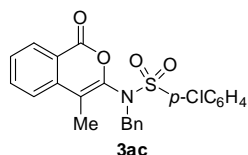

Isocoumarin **3ac** (79.5 mg, 0.181 mmol) was prepared from 2-iodobenzoic acid **1a** (99.2 mg, 0.40 mmol) and ynamide **2c** (64.0 mg, 0.20 mmol) in 90% yield after stirred at 100 °C for 17.0 h.

**3ac:**  $R_f = 0.20$  [10:1 petroleum ether/EtOAc]; white solid; mp = 160–161 °C;  $^1\text{H}$  NMR (400 MHz,  $\text{CDCl}_3$ )  $\delta$  2.02 (s, 3H), 4.25 (s, 1H), 4.86 (s, 1H), 7.21-7.24 (m, 3H), 7.27-7.30 (m, 2H), 7.48-7.56 (m, 4H), 7.73 (t, 1H,  $J = 7.5$  Hz), 7.82 (d, 2H,  $J = 8.5$  Hz), 8.26 (d, 1H,  $J = 7.9$  Hz);  $^{13}\text{C}$  NMR (100 MHz,  $\text{CDCl}_3$ )  $\delta$  12.7, 52.7, 115.4, 121.0, 124.5, 128.6, 128.7, 129.0, 129.5, 129.6, 129.8, 130.0, 133.9, 135.1, 137.0, 137.9, 140.4, 140.5, 161.7; IR (KBr) ( $\text{cm}^{-1}$ ) 3090w, 2924w, 1740s, 1658s, 1605m, 1587m, 1485s, 1356s, 1241s, 1169s; HRMS (ESI):  $m/z$  calcd for  $\text{C}_{23}\text{H}_{18}\text{ClNO}_4\text{SNa}$   $[\text{M}+\text{Na}]^+$ : 462.0537; found 462.0536.

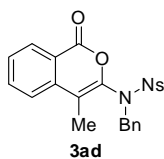

Isocoumarin **3ad** (73.5 mg, 0.163 mmol) was prepared from 2-iodobenzoic acid **1a** (99.2 mg, 0.40 mmol) and ynamide **2d**<sup>2</sup> (66.1 mg, 0.20 mmol) in 82% yield after stirred at 100 °C for 26.0 h.

**3ad:**  $R_f = 0.12$  [10:1 petroleum ether/EtOAc]; pale yellow solid; mp = 170–171 °C;  $^1\text{H}$  NMR (400 MHz,  $\text{CDCl}_3$ )  $\delta$  2.01 (s, 3H), 4.29 (s, 1H), 4.92 (s, 1H), 7.23-7.30 (m, 5H), 7.51-7.59 (m, 2H), 7.74-7.79 (m, 1H), 8.07 (d, 2H,  $J = 8.7$  Hz), 8.27 (d, 1H,  $J = 7.8$  Hz), 8.42 (d, 2H,  $J = 8.8$  Hz);  $^{13}\text{C}$  NMR (100 MHz,  $\text{CDCl}_3$ )  $\delta$  12.6, 53.2, 115.8, 121.1, 124.6, 124.7, 128.8, 129.3, 129.5, 129.6, 130.1, 133.4, 135.3, 137.7, 140.1, 144.3, 150.7, 161.5; IR (KBr) ( $\text{cm}^{-1}$ ) 3039w, 2927w, 1743s, 1655m, 1607m, 1530s, 1484m, 1458m, 1360s, 1242m, 1172s; HRMS (ESI):  $m/z$  calcd for  $\text{C}_{23}\text{H}_{18}\text{N}_2\text{O}_6\text{SNa}$   $[\text{M}+\text{Na}]^+$ : 473.0778; found 473.0774.

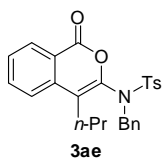

Isocoumarin **3ae** (57.4 mg, 0.128 mmol) was prepared from 2-iodobenzoic acid **1a** (68.2 mg, 0.27 mmol) and ynamide **2e** (45.0 mg, 0.14 mmol) in 93% yield after stirred at 100 °C for 12.0 h.

**3ae:**  $R_f = 0.20$  [10:1 petroleum ether/EtOAc]; white solid; mp = 132–133 °C;  $^1\text{H}$  NMR (400 MHz,  $\text{CDCl}_3$ )  $\delta$  0.44 (s, 1H), 0.85 (t, 3H,  $J = 7.3$  Hz), 1.41 (s, 1H), 2.43-2.62 (m, 5H), 4.21 (d, 1H,  $J = 10.0$  Hz), 4.85 (d, 1H,  $J = 9.6$  Hz), 7.20-7.25 (m, 3H), 7.28-7.31 (m, 2H), 7.37 (d, 2H,  $J = 8.0$  Hz), 7.49-7.52 (m, 2H), 7.69-7.73 (m, 1H), 7.77 (d, 2H,  $J = 8.3$  Hz), 8.27 (dd, 1H,  $J = 1.3, 8.3$  Hz);  $^{13}\text{C}$  NMR (100 MHz,  $\text{CDCl}_3$ )  $\delta$  14.7, 21.8, 22.2, 28.8, 52.6, 119.7, 121.5, 124.8, 128.3, 128.4, 128.67, 128.70, 129.7, 130.0, 130.1, 134.6, 134.9, 135.4, 137.4, 140.7, 144.7, 161.8; IR (KBr) ( $\text{cm}^{-1}$ ) 3063w, 2963s, 2877m, 1736s, 1647s, 1597s, 1487s, 1455s, 1348s, 1240s, 1163s; HRMS (ESI):  $m/z$  calcd for  $\text{C}_{26}\text{H}_{25}\text{NO}_4\text{SNa}$   $[\text{M}+\text{Na}]^+$ : 470.1397; found 470.1384.

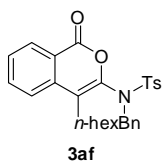

Isocoumarin **3af** (94.5 mg, 0.193 mmol) was prepared from 2-iodobenzoic acid **1a** (99.2 mg, 0.40 mmol) and ynamide **2f**<sup>1</sup> (73.9 mg, 0.20 mmol) in 97% yield after stirred at 100 °C for 17.5 h.

**3af**:  $R_f$  = 0.22 [10:1 petroleum ether/EtOAc]; white solid; mp = 123–124 °C; <sup>1</sup>H NMR (400 MHz, CDCl<sub>3</sub>) δ 0.38 (s, 1H), 0.90 (t, 3H,  $J$  = 7.2 Hz), 1.13-1.32 (m, 7H), 2.46-2.62 (m, 5H), 4.20 (d, 1H,  $J$  = 12.5 Hz), 4.85 (d, 1H,  $J$  = 12.7 Hz), 7.21-7.25 (m, 3H), 7.28-7.32 (m, 2H), 7.37 (d, 2H,  $J$  = 8.2 Hz), 7.49-7.53 (m, 2H), 7.70-7.74 (m, 1H), 7.77 (d, 2H,  $J$  = 8.2 Hz), 8.27 (d, 1H,  $J$  = 7.4 Hz); <sup>13</sup>C NMR (100 MHz, CDCl<sub>3</sub>) δ 14.2, 21.8, 22.8, 26.9, 28.9, 30.0, 31.6, 52.5, 119.8, 121.6, 124.8, 128.3, 128.5, 128.6, 128.7, 129.7, 130.0, 130.1, 134.6, 134.9, 135.4, 137.4, 140.6, 144.7, 161.8; IR (KBr) (cm<sup>-1</sup>) 3061w, 2929s, 2860s, 1732s, 1645s, 1597s, 1562m, 1485s, 1456s, 1359s, 1241s, 1164s; HRMS (ESI):  $m/z$  calcd for C<sub>29</sub>H<sub>31</sub>NO<sub>4</sub>SNa [M+Na]<sup>+</sup>: 512.1866; found 512.1865.

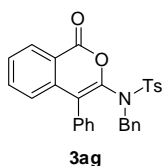

Isocoumarin **3ag** (80.3 mg, 0.167 mmol) was prepared from 2-iodobenzoic acid **1a** (99.2 mg, 0.40 mmol) and ynamide **2g**<sup>1</sup> (72.2 mg, 0.20 mmol) in 83% yield after stirred at 100 °C for 64.0 h.

**3ag**:  $R_f$  = 0.16 [10:1 petroleum ether/EtOAc]; white solid; mp = 153–154 °C; <sup>1</sup>H NMR (400 MHz, CDCl<sub>3</sub>) δ 2.46 (s, 3H), 4.29 (s, 2H), 6.80-7.03 (m, 5H), 7.11 (t, 2H,  $J$  = 7.5 Hz), 7.20 (t, 1H,  $J$  = 7.3 Hz), 7.31-7.35 (m, 4H), 7.40 (t, 1H,  $J$  = 7.3 Hz), 7.49-7.58 (m, 2H), 7.71 (d, 2H,  $J$  = 8.2 Hz), 8.32 (d, 1H,  $J$  = 7.6 Hz); <sup>13</sup>C NMR (100 MHz, CDCl<sub>3</sub>) δ 21.8, 52.8, 121.0, 126.4, 128.2, 128.26, 128.28, 128.6, 128.8, 128.9, 129.6, 129.8, 129.9, 130.8, 131.6, 133.8, 134.9, 135.6, 138.6, 141.7, 144.6, 161.7; IR (KBr) (cm<sup>-1</sup>) 3062w, 3033w, 2924w, 1739s, 1647m, 1598m, 1564w, 1482m, 1458w, 1340s, 1247m, 1167s; HRMS (ESI):  $m/z$  calcd for C<sub>29</sub>H<sub>23</sub>NO<sub>4</sub>SNa [M+Na]<sup>+</sup>: 504.1240; found 504.1239.

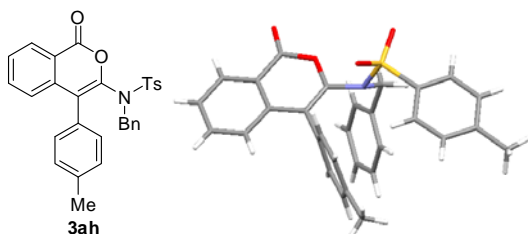

Isocoumarin **3ah** (74.5 mg, 0.150 mmol) was prepared from 2-iodobenzoic acid **1a** (99.2 mg, 0.40 mmol) and ynamide **2h**<sup>3</sup> (75.1 mg, 0.20 mmol) in 75% yield after stirred at 100 °C for 118.0 h.

**3ah:**  $R_f$  = 0.20 [10:1 petroleum ether/EtOAc]; white solid; mp = 190–191 °C;  $^1\text{H}$  NMR (400 MHz,  $\text{CDCl}_3$ )  $\delta$  2.43 (s, 3H), 2.46 (s, 3H), 4.29 (s, 2H), 6.70-6.90 (m, 4H), 7.05-7.21 (m, 6H), 7.34 (d, 2H,  $J$  = 8.1 Hz), 7.48-7.58 (m, 2H), 7.73 (d, 2H,  $J$  = 8.1 Hz), 8.31 (d, 1H,  $J$  = 7.7 Hz);  $^{13}\text{C}$  NMR (100 MHz,  $\text{CDCl}_3$ )  $\delta$  21.5, 21.8, 52.9, 120.9, 121.1, 126.5, 128.2, 128.51, 128.54, 128.8, 128.9, 129.0, 129.6, 129.8, 129.9, 130.7, 133.9, 134.8, 135.7, 138.0, 138.8, 141.8, 144.6, 161.8; IR (KBr) ( $\text{cm}^{-1}$ ) 3031w, 2921w, 1736s, 1644s, 1596m, 1514m, 1482m, 1339s, 1246m, 1171s; HRMS (ESI):  $m/z$  calcd for  $\text{C}_{30}\text{H}_{25}\text{NO}_4\text{SNa}$  [ $\text{M}+\text{Na}$ ] $^+$ : 518.1397; found 518.1372.

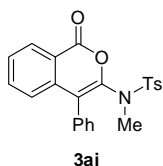

Isocoumarin **3ai** (63.8 mg, 0.157 mmol) was prepared from 2-iodobenzoic acid **1a** (99.2 mg, 0.40 mmol) and ynamide **2i**<sup>4</sup> (57.1 mg, 0.20 mmol) in 79% yield after stirred at 100 °C for 43.0 h.

**3ai:**  $R_f$  = 0.12 [10:1 petroleum ether/EtOAc]; white solid; mp = 176–177 °C;  $^1\text{H}$  NMR (400 MHz,  $\text{CDCl}_3$ )  $\delta$  2.44 (s, 3H), 2.87 (s, 3H), 7.22 (d, 1H,  $J$  = 8.0 Hz), 7.32 (d, 2H,  $J$  = 8.0 Hz), 7.43-7.51 (m, 4H), 7.52-7.57 (m, 2H), 7.63-7.70 (m, 3H), 8.35 (dd, 1H,  $J$  = 1.0, 7.9 Hz);  $^{13}\text{C}$  NMR (100 MHz,  $\text{CDCl}_3$ )  $\delta$  21.8, 36.8, 119.2, 121.3, 126.2, 128.5, 128.6, 128.9, 129.0, 129.8, 130.0, 130.5, 132.2, 135.0, 135.1, 138.5, 144.3, 144.4, 161.7; IR (KBr) ( $\text{cm}^{-1}$ ) 3069w, 2922w, 1746s, 1650m, 1597w, 1494w, 1352s, 1243m, 1164s; HRMS (ESI):  $m/z$  calcd for  $\text{C}_{23}\text{H}_{19}\text{NO}_4\text{SNa}$  [ $\text{M}+\text{Na}$ ] $^+$ : 428.0927; found 428.0931.

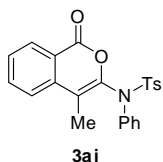

Isocoumarin **3aj** (48.4 mg, 0.119 mmol) was prepared from 2-iodobenzoic acid **1a** (99.2 mg, 0.40 mmol) and ynamide **2j**<sup>5</sup> (57.1 mg, 0.20 mmol) in 59% yield after stirred at 100 °C for 69.0 h.

**3aj:**  $R_f$  = 0.15 [10:1 petroleum ether/EtOAc]; pale yellow solid; mp = 177–178 °C;  $^1\text{H}$  NMR (400 MHz,  $\text{CDCl}_3$ )  $\delta$  2.428 (s, 3H), 2.435 (s, 3H), 7.26-7.31 (m, 5H), 7.38-7.41 (m, 2H), 7.55 (t, 1H,  $J$  = 7.6 Hz), 7.62-7.65 (m, 3H), 7.77 (t, 1H,  $J$  = 7.6 Hz), 8.32 (d, 1H,  $J$  = 7.9 Hz);  $^{13}\text{C}$  NMR (100 MHz,  $\text{CDCl}_3$ )  $\delta$  12.4, 21.8, 113.5, 121.5, 124.4, 128.2, 128.6, 128.7, 128.9, 129.5, 129.7, 130.1, 135.1, 135.5, 138.4, 138.6, 143.0, 144.6, 161.9; IR (KBr) ( $\text{cm}^{-1}$ ) 2921m, 2851w, 1736s, 1655s, 1596m, 1484s, 1455m, 1359s, 1238s, 1168s; HRMS (ESI):  $m/z$  calcd for  $\text{C}_{23}\text{H}_{19}\text{NO}_4\text{SNa}$  [ $\text{M}+\text{Na}$ ] $^+$ : 428.0927; found 428.0927.

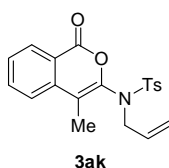



Isocoumarin **3ak** (24.6 mg, 0.067 mmol) was prepared from 2-iodobenzoic acid **1a** (99.2 mg, 0.40 mmol) and ynamide **2k**<sup>6</sup> (49.9 mg, 0.20 mmol) in 33% yield after stirred at 100 °C for 5.5 h.

**3ak**:  $R_f = 0.20$  [10:1 petroleum ether/EtOAc]; white solid; mp = 134–135 °C; <sup>1</sup>H NMR (400 MHz, CDCl<sub>3</sub>) δ 2.39 (s, 3H), 2.45 (s, 3H), 3.86 (s, 1H), 4.20 (s, 1H), 5.08–5.18 (m, 2H), 5.74–5.84 (m, 1H), 7.35 (d, 2H,  $J = 8.1$  Hz), 7.57 (t, 1H,  $J = 7.5$  Hz), 7.67 (d, 1H,  $J = 8.0$  Hz), 7.73 (d, 2H,  $J = 8.2$  Hz), 7.79–7.83 (m, 1H), 8.30 (d, 1H,  $J = 7.7$  Hz); <sup>13</sup>C NMR (100 MHz, CDCl<sub>3</sub>) δ 13.1, 21.8, 51.7, 114.9, 120.8, 121.3, 124.5, 128.2, 128.9, 130.05, 130.07, 131.3, 135.2, 135.5, 138.3, 141.4, 144.7, 161.9; IR (KBr) (cm<sup>-1</sup>) 2921w, 1731s, 1657m, 1595w, 1487m, 1349s, 1244m, 1211m, 1164s; HRMS (ESI):  $m/z$  calcd for C<sub>20</sub>H<sub>19</sub>NO<sub>4</sub>SNa [M+Na]<sup>+</sup>: 392.0927; found 392.0914.

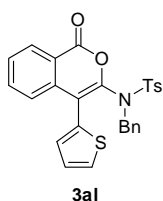

Isocoumarin **3al** (70.0 mg, 0.144 mmol) was prepared from 2-iodobenzoic acid **1a** (99.2 mg, 0.40 mmol) and ynamide **2l**<sup>7</sup> (73.5 mg, 0.20 mmol) in 72% yield after stirred at 100 °C for 47.0 h.

**3al**:  $R_f = 0.18$  [10:1 petroleum ether/EtOAc]; white solid; mp = 156–157 °C; <sup>1</sup>H NMR (400 MHz, CDCl<sub>3</sub>) δ 2.47 (s, 3H), 4.35 (s, 2H), 6.81 (d, 1H,  $J = 3.0$  Hz), 6.94 (d, 2H,  $J = 7.4$  Hz), 7.06–7.19 (m, 4H), 7.29 (d, 1H,  $J = 8.0$  Hz), 7.37 (d, 2H,  $J = 8.2$  Hz), 7.44 (d, 1H,  $J = 5.1$  Hz), 7.53 (t, 1H,  $J = 7.5$  Hz), 7.63 (t, 1H,  $J = 7.6$  Hz), 7.78 (d, 2H,  $J = 8.2$  Hz), 8.29 (d, 1H,  $J = 7.8$  Hz); <sup>13</sup>C NMR (100 MHz, CDCl<sub>3</sub>) δ 21.8, 53.0, 114.9, 120.7, 126.4, 126.9, 127.5, 128.3, 128.6, 128.8, 129.2, 129.4, 129.8, 130.0, 130.7, 131.3, 133.8, 135.1, 135.6, 138.6, 143.3, 144.7, 161.3; IR (KBr) (cm<sup>-1</sup>) 3035w, 2927w, 1742s, 1643m, 1566w, 1480m, 1456m, 1356s, 1244m, 1163s; HRMS (ESI):  $m/z$  calcd for C<sub>27</sub>H<sub>21</sub>NO<sub>4</sub>S<sub>2</sub>Na [M+Na]<sup>+</sup>: 510.0804; found 510.0790.

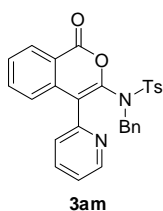

Isocoumarin **3am** (22.7 mg, 0.047 mmol) was prepared from 2-iodobenzoic acid **1a** (49.6 mg, 0.20 mmol) and ynamide **2m**<sup>7</sup> (36.2 mg, 0.10 mmol) in 47% yield after stirred at 100 °C for 30.0 h.

**3am**:  $R_f = 0.22$  [2:1 petroleum ether/EtOAc]; pale yellow solid; mp = 154–155 °C; <sup>1</sup>H NMR (400 MHz, CDCl<sub>3</sub>) δ 2.48 (s, 3H), 4.30 (s, 2H), 6.87 (d, 2H,  $J = 7.3$  Hz), 7.06 (t, 2H,  $J = 7.4$  Hz), 7.13–7.19 (m, 2H), 7.30–7.38 (m, 3H), 7.51–7.63 (m, 3H), 7.80–7.85 (m, 3H), 8.31 (d, 1H,  $J = 7.6$  Hz), 8.54 (d, 1H,  $J = 3.8$  Hz); <sup>13</sup>C NMR (100 MHz, CDCl<sub>3</sub>) δ 21.9, 53.6, 120.0, 121.2, 123.1, 126.5, 126.7, 128.2, 128.6, 128.8,

129.2, 129.9, 130.0, 133.7, 135.1, 135.7, 137.1, 137.5, 143.5, 144.8, 149.3, 151.7, 161.6; IR (KBr) ( $\text{cm}^{-1}$ ) 2923w, 1737s, 1650w, 1586w, 1484w, 1456w, 1350m, 1248w, 1161s; HRMS (ESI):  $m/z$  calcd for  $\text{C}_{28}\text{H}_{22}\text{N}_2\text{O}_4\text{SNa}$   $[\text{M}+\text{Na}]^+$ : 505.1192; found 505.1183.

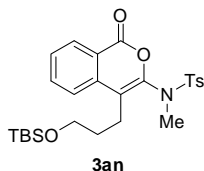

Isocoumarin **3an** (65.9 mg, 0.131 mmol) was prepared from 2-iodobenzoic acid **1a** (99.2 mg, 0.40 mmol) and ynamide **2n**<sup>8</sup> (76.3 mg, 0.20 mmol) in 66% yield after stirred at 100 °C for 22.0 h.

**3an**:  $R_f$  = 0.18 [10:1 petroleum ether/EtOAc]; white solid; mp = 114–115 °C;  $^1\text{H}$  NMR (400 MHz,  $\text{CDCl}_3$ )  $\delta$  0.11 (s, 6H), 0.96 (s, 9H), 1.90 (s, 2H), 2.46 (s, 3H), 2.98 (s, 2H), 3.09 (s, 3H), 3.77 (t, 2H,  $J$  = 5.8 Hz), 7.36 (d, 2H,  $J$  = 8.1 Hz), 7.53–7.57 (m, 1H), 7.75–7.80 (m, 3H), 7.86 (d, 1H,  $J$  = 8.0 Hz), 8.30 (dd, 1H,  $J$  = 1.0, 7.9 Hz);  $^{13}\text{C}$  NMR (100 MHz,  $\text{CDCl}_3$ )  $\delta$  -5.2, 18.5, 21.8, 23.0, 26.1, 32.2, 36.8, 62.8, 117.2, 121.8, 125.0, 128.6, 128.8, 129.9, 130.2, 134.5, 135.0, 137.6, 143.6, 144.6, 161.9; IR (KBr) ( $\text{cm}^{-1}$ ) 2954s, 2928s, 2857s, 1743s, 1654m, 1598w, 1490m, 1460m, 1354s, 1253s, 1164s; HRMS (ESI):  $m/z$  calcd for  $\text{C}_{26}\text{H}_{35}\text{NO}_5\text{SSiNa}$   $[\text{M}+\text{Na}]^+$ : 524.1897; found 524.1891.

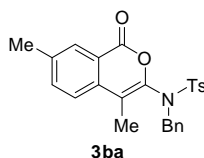

Isocoumarin **3ba** (74.5 mg, 0.172 mmol) was prepared from 2-iodoaromatic acid **1b** (104.8 mg, 0.40 mmol) and ynamide **2a** (59.9 mg, 0.20 mmol) in 86% yield after stirred at 100 °C for 12.0 h.

**3ba**:  $R_f$  = 0.20 [10:1 petroleum ether/EtOAc]; white solid; mp = 114–115 °C;  $^1\text{H}$  NMR (400 MHz,  $\text{CDCl}_3$ )  $\delta$  2.02 (s, 3H), 2.44 (s, 3H), 2.46 (s, 3H), 4.22 (s, 1H), 4.86 (s, 1H), 7.19–7.24 (m, 3H), 7.26–7.30 (m, 2H), 7.35–7.39 (m, 3H), 7.52 (dd, 1H,  $J$  = 1.4, 8.2 Hz), 7.76 (d, 2H,  $J$  = 8.3 Hz), 8.05 (d, 1H,  $J$  = 0.5 Hz);  $^{13}\text{C}$  NMR (100 MHz,  $\text{CDCl}_3$ )  $\delta$  12.7, 21.3, 21.8, 52.4, 115.1, 120.9, 124.4, 128.2, 128.4, 128.6, 129.5, 129.7, 130.0, 134.4, 135.58, 135.63, 136.2, 139.2, 140.1, 144.6, 162.0; IR (KBr) ( $\text{cm}^{-1}$ ) 2924w, 1732s, 1656m, 1597w, 1502m, 1456w, 1353s, 1247m, 1165s; HRMS (ESI):  $m/z$  calcd for  $\text{C}_{25}\text{H}_{23}\text{NO}_4\text{SNa}$   $[\text{M}+\text{Na}]^+$ : 456.1240; found 456.1231.

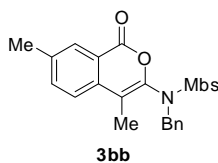

Isocoumarin **3bb** (83.7 mg, 0.186 mmol) was prepared from 2-iodoaromatic acid **1b** (104.8 mg, 0.40 mmol) and ynamide **2b** (63.1 mg, 0.20 mmol) in 93% yield after stirred at 100 °C for 10.0 h.

**3bb**:  $R_f = 0.33$  [4:1 petroleum ether/EtOAc]; white solid; mp = 65–66 °C;  $^1\text{H NMR}$  (400 MHz,  $\text{CDCl}_3$ )  $\delta$  2.02 (s, 3H), 2.44 (s, 3H), 3.89 (s, 3H), 4.23 (s, 1H), 4.84 (s, 1H), 7.01-7.05 (m, 2H), 7.19-7.24 (m, 3H), 7.27-7.30 (m, 2H), 7.38 (d, 1H,  $J = 8.2$  Hz), 7.52 (dd, 1H,  $J = 1.6, 8.2$  Hz), 7.80-7.84 (m, 2H), 8.05 (s, 1H);  $^{13}\text{C NMR}$  (100 MHz,  $\text{CDCl}_3$ )  $\delta$  12.6, 21.3, 52.4, 55.8, 114.6, 115.1, 120.9, 124.3, 128.3, 128.6, 129.4, 129.7, 130.1, 130.3, 134.4, 135.6, 136.2, 139.1, 140.3, 162.1, 163.7; IR (KBr) ( $\text{cm}^{-1}$ ) 2925w, 1731s, 1655s, 1596s, 1498s, 1456m, 1352s, 1263s, 1162s; HRMS (ESI):  $m/z$  calcd for  $\text{C}_{25}\text{H}_{23}\text{NO}_5\text{SNa}$   $[\text{M}+\text{Na}]^+$ : 472.1189; found 472.1196.

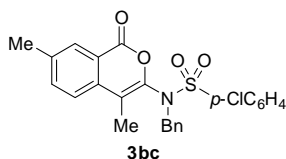

Isocoumarin **3bc** (80.2 mg, 0.177 mmol) was prepared from 2-iodoaromatic acid **1b** (104.8 mg, 0.40 mmol) and ynamide **2c** (64.0 mg, 0.20 mmol) in 88% yield after stirred at 100 °C for 22.0 h.

**3bc**:  $R_f = 0.21$  [10:1 petroleum ether/EtOAc]; white solid; mp = 61–62 °C;  $^1\text{H NMR}$  (400 MHz,  $\text{CDCl}_3$ )  $\delta$  1.99 (s, 3H), 2.45 (s, 3H), 4.24 (s, 1H), 4.85 (s, 1H), 7.21-7.23 (m, 3H), 7.27-7.29 (m, 2H), 7.38 (d, 1H,  $J = 8.2$  Hz), 7.53-7.56 (m, 3H), 7.80-7.84 (m, 2H), 8.07 (s, 1H);  $^{13}\text{C NMR}$  (100 MHz,  $\text{CDCl}_3$ )  $\delta$  12.6, 21.4, 52.7, 115.4, 121.0, 124.4, 128.6, 128.7, 129.5, 129.6, 129.78, 129.83, 134.0, 135.5, 136.3, 137.1, 139.4, 139.8, 140.3, 161.9; IR (KBr) ( $\text{cm}^{-1}$ ) 2924w, 1735s, 1656m, 1586w, 1502m, 1360s, 1246m, 1168s; HRMS (ESI):  $m/z$  calcd for  $\text{C}_{24}\text{H}_{20}\text{ClNO}_4\text{SNa}$   $[\text{M}+\text{Na}]^+$ : 476.0694; found 476.0680.

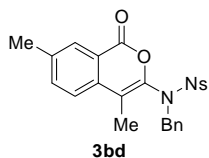

Isocoumarin **3bd** (75.2 mg, 0.162 mmol) was prepared from 2-iodoaromatic acid **1b** (104.8 mg, 0.40 mmol) and ynamide **2d** (67.6 mg, 0.20 mmol) in 81% yield after stirred at 100 °C for 12.0 h.

**3bd**:  $R_f = 0.15$  [10:1 petroleum ether/EtOAc]; green yellow solid; mp = 67–68 °C;  $^1\text{H NMR}$  (400 MHz,  $\text{CDCl}_3$ )  $\delta$  1.99 (s, 3H), 2.46 (s, 3H), 4.28 (s, 1H), 4.91 (s, 1H), 7.22-7.29 (m, 5H), 7.40 (d, 1H,  $J = 8.2$  Hz), 7.56 (dd, 1H,  $J = 1.4, 8.2$  Hz), 8.05-8.08 (m, 3H), 8.39-8.42 (m, 2H);  $^{13}\text{C NMR}$  (100 MHz,  $\text{CDCl}_3$ )  $\delta$  12.5, 21.4, 53.1, 115.7, 120.9, 124.5, 124.6, 128.8, 129.5, 129.6, 129.9, 133.5, 135.2, 136.5, 139.3, 139.7, 144.4, 150.6, 161.6; IR (KBr) ( $\text{cm}^{-1}$ ) 2923w, 1735s, 1655m, 1531s, 1502m, 1456w, 1349s, 1247m, 1168s; HRMS (ESI):  $m/z$  calcd for  $\text{C}_{24}\text{H}_{20}\text{N}_2\text{O}_6\text{SNa}$   $[\text{M}+\text{Na}]^+$ : 487.0934; found 487.0923.

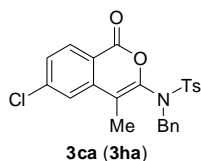

**3ca:** Isocoumarin **3da** (76.1 mg, 0.168 mmol) was prepared from 2-iodoaromatic acid **1d** (113.0 mg, 0.40 mmol) and ynamide **2a** (59.9 mg, 0.20 mmol) in 84% yields after stirred at 100 °C for 21.0 h.

**3ha:** Isocoumarin **3ia** (34.4 mg, 0.076 mmol) was prepared from 2-bromoaromatic acid **1i** (94.2 mg, 0.40 mmol) and ynamide **2a** (59.9 mg, 0.20 mmol) in 38% yield after stirred at 100 °C for 85.0 h.

**3ca (3ha):**  $R_f$  = 0.21 [10:1 petroleum ether/EtOAc]; white solid; mp = 159–160 °C;  $^1\text{H}$  NMR (400 MHz,  $\text{CDCl}_3$ )  $\delta$  2.05 (s, 3H), 2.49 (s, 3H), 4.23 (s, 1H), 4.88 (s, 1H), 7.20-7.35 (m, 5H), 7.37-7.49 (m, 4H), 7.79 (d, 2H,  $J$  = 7.7 Hz), 8.19 (d, 1H,  $J$  = 8.4 Hz);  $^{13}\text{C}$  NMR (100 MHz,  $\text{CDCl}_3$ )  $\delta$  12.8, 21.8, 52.5, 114.4, 119.3, 124.3, 128.2, 128.5, 128.7, 129.2, 129.4, 130.1, 131.5, 134.1, 135.4, 139.6, 142.0, 142.1, 144.8, 161.0; IR (KBr) ( $\text{cm}^{-1}$ ) 2923w, 1749s, 1660m, 1599s, 1477w, 1356s, 1238w, 1169s; HRMS (ESI):  $m/z$  calcd for  $\text{C}_{24}\text{H}_{20}\text{ClNO}_4\text{SNa}$  [ $\text{M}+\text{Na}$ ] $^+$ : 476.0694; found 476.0696.

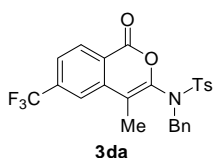

Isocoumarin **3da** (78.7 mg, 0.161 mmol) was prepared from 2-iodoaromatic acid **1d** (126.4 mg, 0.40 mmol) and ynamide **2a** (59.9 mg, 0.20 mmol) in 81% yield after stirred at 100 °C for 21.0 h.

**3da:**  $R_f$  = 0.29 [10:1 petroleum ether/EtOAc]; white solid; mp = 156–157 °C;  $^1\text{H}$  NMR (400 MHz,  $\text{CDCl}_3$ )  $\delta$  2.10 (s, 3H), 2.48 (s, 3H), 4.23 (s, 1H), 4.88 (s, 1H), 7.22-7.39 (m, 7H), 7.73-7.78 (m, 4H), 8.36 (d, 1H,  $J$  = 8.4 Hz);  $^{13}\text{C}$  NMR (100 MHz,  $\text{CDCl}_3$ )  $\delta$  12.8, 21.8, 52.5, 114.7, 121.6 (q,  $J$  = 3.8 Hz), 123.3 (q,  $J$  = 271.8 Hz), 123.5, 125.1 (q,  $J$  = 3.3 Hz), 128.2, 128.6, 128.7, 129.4, 130.2, 130.9, 134.0, 135.3, 136.5 (q,  $J$  = 32.7 Hz), 138.7, 142.3, 144.9, 160.7; IR (KBr) ( $\text{cm}^{-1}$ ) 3078w, 3057w, 2918w, 1754s, 1654s, 1597m, 1574m, 1493m, 1430m, 1356s, 1287s, 1169s; HRMS (ESI):  $m/z$  calcd for  $\text{C}_{25}\text{H}_{20}\text{F}_3\text{NO}_4\text{SNa}$  [ $\text{M}+\text{Na}$ ] $^+$ : 510.0957; found 510.0958.

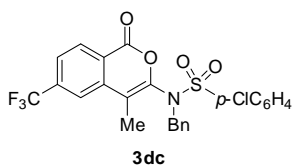

Isocoumarin **3dc** (82.2 mg, 0.162 mmol) was prepared from 2-iodoaromatic acid **1d** (126.4 mg, 0.40 mmol) and ynamide **2c** (64.0 mg, 0.20 mmol) in 81% yield after stirred at 100 °C for 12.0 h.

**3ec:**  $R_f$  = 0.43 [10:1 petroleum ether/EtOAc]; white solid; mp = 158–159 °C;  $^1\text{H}$  NMR (400 MHz,  $\text{CDCl}_3$ )  $\delta$  2.07 (s, 3H), 4.26 (s, 1H), 4.87 (s, 1H), 7.22-7.30 (m, 5H), 7.56 (d, 2H,  $J$  = 8.5 Hz), 7.71-7.77 (m, 2H), 7.83 (d, 2H,  $J$  = 8.5 Hz), 8.37 (d, 1H,  $J$  = 8.1 Hz);  $^{13}\text{C}$  NMR (100 MHz,  $\text{CDCl}_3$ )  $\delta$  12.7, 52.8, 114.9, 121.7 (q,  $J$  = 3.8 Hz), 123.3 (q,  $J$  = 271.8 Hz), 123.5, 125.3 (q,  $J$  = 3.2 Hz), 128.80, 128.83, 129.5, 129.6, 129.9, 131.0, 133.6, 136.6 (q,  $J$  = 32.8 Hz), 136.9, 138.5, 140.6, 141.9, 160.5; IR (KBr)

( $\text{cm}^{-1}$ ) 3090w, 1754s, 1655m, 1575w, 1476w, 1362s, 1288s, 1171s; HRMS (ESI):  $m/z$  calcd for  $\text{C}_{24}\text{H}_{27}\text{ClF}_3\text{NO}_4\text{SNa}$  [ $\text{M}+\text{Na}$ ] $^+$ : 530.0411; found 530.0407.

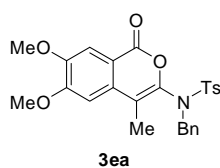

Isocoumarin **3ea** (73.1 mg, 0.152 mmol) was prepared from 2-iodoaromatic acid **1e** (123.2 mg, 0.40 mmol) and ynamide **2a** (59.9 mg, 0.20 mmol) in 76% yield after stirred at 100 °C for 4.0 h.

**3ea**:  $R_f$  = 0.18 [4:1 petroleum ether/EtOAc]; white solid; mp = 203–204 °C;  $^1\text{H}$  NMR (400 MHz,  $\text{CDCl}_3$ )  $\delta$  2.04 (s, 3H), 2.47 (s, 3H), 3.96 (s, 6H), 4.23 (s, 1H), 4.86 (s, 1H), 6.82 (s, 1H), 7.22–7.38 (m, 7H), 7.62 (s, 1H), 7.76 (d, 2H,  $J$  = 6.8 Hz);  $^{13}\text{C}$  NMR (100 MHz,  $\text{CDCl}_3$ )  $\delta$  13.0, 21.8, 52.4, 56.3, 56.4, 105.2, 109.8, 114.2, 114.8, 128.1, 128.4, 128.6, 129.5, 130.1, 133.8, 134.4, 135.5, 140.1, 144.6, 150.0, 155.1, 161.7; IR (KBr) ( $\text{cm}^{-1}$ ) 2924w, 1716s, 1655w, 1604m, 1513s, 1457w, 1392m, 1355s, 1269s, 1172s; HRMS (ESI):  $m/z$  calcd for  $\text{C}_{26}\text{H}_{25}\text{NO}_6\text{SNa}$  [ $\text{M}+\text{Na}$ ] $^+$ : 502.1295; found 502.1274.

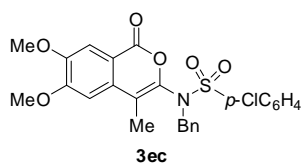

Isocoumarin **3ec** (71.8 mg, 0.144 mmol) was prepared from 2-iodoaromatic acid **1e** (123.2 mg, 0.40 mmol) and ynamide **2c** (64.0 mg, 0.20 mmol) in 72% yield after stirred at 100 °C for 4.0 h.

**3ec**:  $R_f$  = 0.18 [4:1 petroleum ether/EtOAc]; pale yellow solid; mp = 184–185 °C;  $^1\text{H}$  NMR (400 MHz,  $\text{CDCl}_3$ )  $\delta$  2.01 (s, 3H), 3.97 (s, 3H), 4.24 (d, 1H,  $J$  = 8.2 Hz), 4.87 (d, 1H,  $J$  = 8.2 Hz), 6.81 (s, 1H), 7.22–7.30 (m, 5H), 7.55 (d, 2H,  $J$  = 8.5 Hz), 7.62 (s, 1H), 7.81 (d, 2H,  $J$  = 8.5 Hz);  $^{13}\text{C}$  NMR (100 MHz,  $\text{CDCl}_3$ )  $\delta$  12.9, 52.7, 56.4, 56.5, 105.3, 109.9, 114.3, 115.1, 128.6, 128.7, 129.5, 129.6, 129.8, 133.6, 134.0, 137.1, 139.7, 140.4, 150.2, 155.2, 161.5; IR (KBr) ( $\text{cm}^{-1}$ ) 2924w, 1717s, 1656m, 1604s, 1512s, 1457m, 1360s, 1269s, 1175s; HRMS (ESI):  $m/z$  calcd for  $\text{C}_{25}\text{H}_{22}\text{ClNO}_6\text{SNa}$  [ $\text{M}+\text{Na}$ ] $^+$ : 522.0749; found 522.0761.

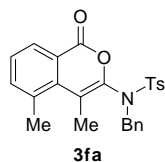

Isocoumarin **3fa** (39.8 mg, 0.092 mmol) was prepared from 2-iodoaromatic acid **1f** (104.8 mg, 0.40 mmol) and ynamide **2a** (59.9 mg, 0.20 mmol) in 46% yield after stirred at 100 °C for 12.0 h.

**3fa**:  $R_f$  = 0.18 [10:1 petroleum ether/EtOAc]; white solid; mp = 139–140 °C;  $^1\text{H}$  NMR (400 MHz,  $\text{CDCl}_3$ )  $\delta$  2.22 (s, 3H), 2.46 (s, 3H), 2.61 (s, 3H), 4.22 (d, 1H,  $J$  = 13.1 Hz), 4.87 (d, 1H,  $J$  = 13.1 Hz),

7.20-7.24 (m, 3H), 7.28-7.31 (m, 2H), 7.34-7.38 (m, 3H), 7.47 (d, 1H,  $J = 7.2$  Hz), 7.77 (d, 2H,  $J = 8.2$  Hz), 8.16 (d, 1H,  $J = 7.4$  Hz);  $^{13}\text{C}$  NMR (100 MHz,  $\text{CDCl}_3$ )  $\delta$  17.8, 21.8, 24.3, 52.5, 116.1, 122.5, 128.2, 128.5, 128.55, 128.65, 129.7, 130.1, 134.2, 135.6, 136.2, 137.1, 139.3, 140.9, 144.7, 162.2; IR (KBr) ( $\text{cm}^{-1}$ ) 2921w, 1728s, 1636m, 1595m, 1495w, 1456m, 1357s, 1260w, 1168s; HRMS (ESI):  $m/z$  calcd for  $\text{C}_{25}\text{H}_{23}\text{NO}_4\text{SNa}$   $[\text{M}+\text{Na}]^+$ : 456.1240; found 456.1223.

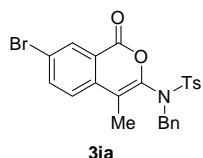

Isocoumarin **3ia** (45.5 mg, 0.091 mmol) was prepared from 2-iodoaromatic acid **1i** (130.8 mg, 0.40 mmol) and ynamide **2a** (59.9 mg, 0.20 mmol) in 46% yield after stirred at 100 °C for 7.5 h.

**3ia**:  $R_f = 0.28$  [10:1 petroleum ether/EtOAc]; white solid; mp = 149–150 °C;  $^1\text{H}$  NMR (400 MHz,  $\text{CDCl}_3$ )  $\delta$  2.03 (s, 3H), 2.47 (s, 3H), 4.20 (s, 1H), 4.86 (s, 1H), 7.20-7.23 (m, 3H), 7.26-7.29 (m, 2H), 7.35-7.39 (m, 3H), 7.75 (d, 2H,  $J = 8.3$  Hz), 7.80 (dd, 1H,  $J = 2.2, 8.6$  Hz), 8.37 (d, 1H,  $J = 2.1$  Hz);  $^{13}\text{C}$  NMR (100 MHz,  $\text{CDCl}_3$ )  $\delta$  12.8, 21.8, 52.5, 114.8, 122.5, 122.7, 126.2, 128.2, 128.5, 128.7, 129.5, 130.2, 132.5, 134.1, 135.4, 136.9, 138.1, 141.3, 144.9, 160.6; IR (KBr) ( $\text{cm}^{-1}$ ) 2924w, 1729s, 1654m, 1596w, 1481w, 1353s, 1232w, 1164s; HRMS (ESI):  $m/z$  calcd for  $\text{C}_{24}\text{H}_{20}\text{BrNO}_4\text{SNa}$   $[\text{M}+\text{Na}]^+$ : 522.0171; found 476.0161.

### Procedures for the Synthesis of Isocoumarins **4** and **5**.<sup>9,10</sup>

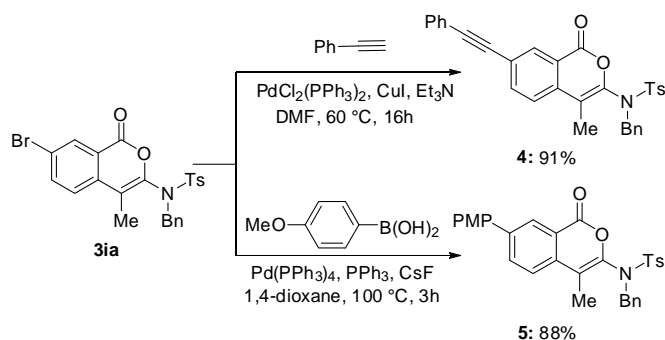

To an oven-dried sealed tube were added isocoumarin **3ia** (99.7 mg, 0.20 mmol),  $\text{PdCl}_2(\text{PPh}_3)_2$  (7.0 mg, 0.01 mmol),  $\text{CuI}$  (2.0 mg, 0.01 mmol),  $\text{DMF}$  (1.5 mL, isocoumarin *concn* = 0.13 M), phenylacetylene (32.9  $\mu\text{L}$ , 0.30 mmol) and  $\text{NEt}_3$  (0.5 mL) in sequence. The reaction was heated to 60 °C and stirred for 16 h. After consumption of the starting material, the mixture was cooled to rt, filtered through a short silica pad, concentrated *in vacuo*, and purified using silica gel flash column chromatography [gradient eluent: 20:1~10:1 petroleum ether/EtOAc] to afford isocoumarin **4** (94.8 mg, 0.182 mmol) in 91% yield.

**4:**  $R_f$  = 0.22 [10:1 petroleum ether/EtOAc]; orange solid; mp = 170–171 °C;  $^1\text{H}$  NMR (400 MHz,  $\text{CDCl}_3$ )  $\delta$  2.05 (s, 3H), 2.46 (s, 3H), 4.22 (s, 1H), 4.86 (s, 1H), 7.21-7.30 (m, 5H), 7.34-7.38 (m, 5H), 7.45 (d, 1H,  $J$  = 8.3 Hz), 7.52-7.54 (m, 2H), 7.76-7.81 (m, 3H), 8.38 (d, 1H,  $J$  = 1.4 Hz);  $^{13}\text{C}$  NMR (100 MHz,  $\text{CDCl}_3$ )  $\delta$  12.8, 21.8, 52.5, 87.9, 92.2, 115.0, 121.2, 122.6, 124.2, 124.6, 128.2, 128.5, 128.6, 128.7, 129.0, 129.4, 130.1, 131.9, 132.9, 134.2, 135.4, 137.4, 137.5, 141.4, 144.8, 161.1; IR (KBr) ( $\text{cm}^{-1}$ ) 2923w, 1741s, 1651m, 1596w, 1503m, 1456w, 1444w, 1356s, 1226w, 1166s; HRMS (ESI):  $m/z$  calcd for  $\text{C}_{32}\text{H}_{25}\text{NO}_4\text{SNa}$  [ $\text{M}+\text{Na}$ ] $^+$ : 542.1397; found 542.1372.

To an oven-dried sealed tube were added isocoumarin **3ia** (78.0 mg, 0.16 mmol), 4-methoxyphenylboronic acid (71.4 mg, 0.47), Pd ( $\text{PPh}_3$ ) $_4$  (18.1 mg, 0.016 mmol),  $\text{PPh}_3$  (8.2 mg, 0.031 mmol), CsF (95.1 mg, 0.63 mmol) and 1,4-dioxane (5.0 mL, isocoumarin *concn* = 0.03 M) in sequence. The solution was heated to 100 °C and monitored by TLC analysis. When the reaction was judged to be completed after 3 h, the reaction mixture was cooled to rt, filtered through a short silica pad, concentrated *in vacuo*, and purified using silica gel flash column chromatography [gradient eluent: 6:1~4:1 petroleum ether/EtOAc] to afford isocoumarin **5** (72.3 mg, 0.138 mmol) in 88% yield.

**5:**  $R_f$  = 0.32 [4:1 petroleum ether/EtOAc]; yellow solid; mp = 172–173 °C;  $^1\text{H}$  NMR (400 MHz,  $\text{CDCl}_3$ )  $\delta$  2.07 (s, 3H), 2.47 (s, 3H), 3.85 (s, 3H), 4.24 (s, 1H), 4.88 (s, 1H), 6.97-7.01 (m, 2H), 7.21-7.25 (m, 3H), 7.29-7.32 (m, 2H), 7.37 (d, 2H,  $J$  = 8.2 Hz), 7.52 (d, 1H,  $J$  = 8.4 Hz), 7.56-7.59 (m, 2H), 7.78 (d, 2H,  $J$  = 8.3 Hz), 7.91 (dd, 1H,  $J$  = 2.0, 8.4 Hz), 8.43 (d, 1H,  $J$  = 1.9 Hz);  $^{13}\text{C}$  NMR (100 MHz,  $\text{CDCl}_3$ )  $\delta$  12.8, 21.8, 52.5, 55.6, 114.7, 115.2, 121.5, 125.0, 127.2, 128.2, 128.3, 128.4, 128.7, 129.5, 130.1, 131.5, 133.2, 134.4, 135.6, 136.3, 140.6, 141.4, 144.7, 160.1, 162.1; IR (KBr) ( $\text{cm}^{-1}$ ) 2925w, 1735s, 1655w, 1607m, 1494m, 1458w, 1351m, 1251m, 1165s; HRMS (ESI):  $m/z$  calcd for  $\text{C}_{31}\text{H}_{27}\text{NO}_5\text{SNa}$  [ $\text{M}+\text{Na}$ ] $^+$ : 548.1502; found 548.1505.

### Further explanation of the mechanism for the annulation.<sup>11,12</sup>

\*\*\*\*\*

### References

- 1 Y. Zhang, R. P. Hsung, M. R. Tracey, K. C. M. Kurtz and E. L. Vera, *Org. Lett.* 2004, **6**, 1151.
- 2 H. Li, R. P. Hsung, K. A. DeKorver and Y. Wei, *Org. Lett.* 2010, **12**, 3780.
- 3 B. Yao, Z. Liang, T. Niu and Y. Zhang, *J. Org. Chem.* 2009, **74**, 4630.
- 4 L. Zhu, Y. Yu, Z. Mao and X. Huang, *Org. Lett.* 2015, **17**, 30.
- 5 S. J. Mansfield, C. D. Campbell, M. W. Jones and E. A. Anderson, *Chem. Commun.* 2015, **51**, 3316.
- 6 K.-B. Wang, R.-Q. Ran, S.-D. Xiu and C.-Y. Li, *Org. Lett.* 2013, **15**, 2374.
- 7 A. Coste, G. Karthikeyan, F. Couty and G. Evano, *Angew. Chem. Int. Ed.* 2009, **48**, 4381.
- 8 D. Fujino, H. Yorimitsu and A. Osuka, *J. Am. Chem. Soc.* 2014, **136**, 6255.
- 9 S. Roy, S. Roy, B. Neuenswander, D. Hill and R. C. Larock, *J. Comb. Chem.*, 2009, **11**, 1128.

- 10 M. Al-Amin, J. S. Johnson and S. A. Blum, *Organometallics*, 2014, **33**, 5448.
- 11 Regarding starting with a Pd(II) catalyst and the actual catalysis involving Pd(0) is standard Pd-catalysis, it is reported that Pd(0) can be generated in situ from any Pd(II) sources using a small amount of phosphine ligands, base, solvent or starting substrates (alkynes). See selected references: (a) N. Miyaura and A. Suzuki, *Chem. Rev.* 1995, **95**, 2457. (b) C. Dasaradhan, Y. Suneel Kumar, F.-R. Nawaz Khan, E. D. Jeong and E. H. Chung, *Tetrahedron Lett.*, 2015, **56**, 187. (c) N. G. Kundu, M. Pal and B. Nandi, *J. Chem. Soc., Perkin Trans. 1*, 1998, 561.
- 12 Migratory insertions, carbometallations, or additions of R-M (M being a metal) to ynamides could favor in reverse of the expected polarization of ynamides. This is often due to the potential of the electron-withdrawing substituents on the ynamides coordinating with the organometal reagents. There are many examples summarized in reference: K. A. DeKorver, H. Li, A. G. Lohse, R. Hayashi, Z. Lu, Y. Zhang and R. P. Hsung, *Chem. Rev.*, 2010, **110**, 5064.
